# Supplementary material for: Mechanism of assembly, activation and lysine selection by the SIN3B histone deacetylase complex
Source: PubMed Central journal article supplement (PMC10156912; doi:10.1038/s41467-023-38276-0), 2023-05-03
Supplement: 41467_2023_38276_MOESM3_ESM.pdf [file 41467_2023_38276_MOESM3_ESM.pdf]

## **Description of Additional Supplementary Files**

File Name: Supplementary Data 1

Description: Crosslinking mass spectrometry data.

File Name: Supplementary Movie 1

Description: Cryo-EM maps and models of the SIN3B complex structures. SIN3B full-length, SIN3B core, SIN3B:SAHA complex cryo-EM structures are presented.
